# Supplementary material
Source: PubMed Central journal article supplement (PMC514514)
Supplement: 7600341s3.pdf [file 7600341s3.pdf]

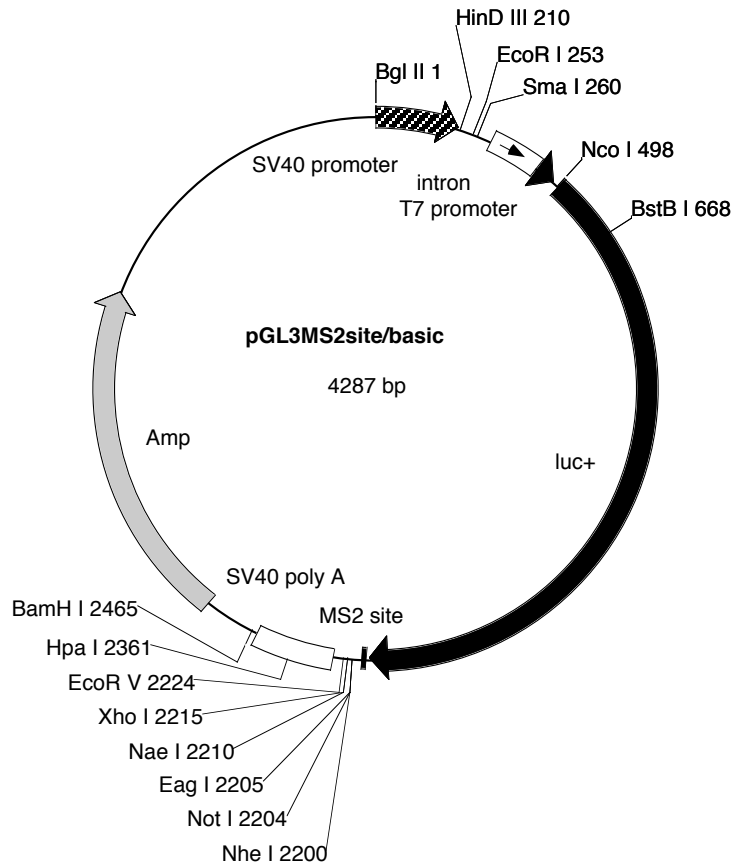

Supplementary figure S3. **Plasmid vectors for TriFC analysis:**

**pGL3MS2site/basic.** All vectors contain the  $\beta$ -lactamase gene for selection in bacteria and express the cloned sequences of interest from a SV40 promoter. The primary transcript contains a chimeric intron in the 5'UTR to enhance expression and model more accurately a general cellular mRNA. Transcripts contain SV40 polyadenylation sequences to ensure efficient 3' end processing. The parental plasmid used for cloning and expression of RNA sequences of interest in a reporter mRNA containing the codon optimized luciferase gene (*luc+*) followed by a recognition site for the MS2 coat protein is called “pGL3MS2site/basic”. The small multiple cloning site (MCS) 3' to the MS2 site (nt 2200-2224) was used to insert fragments of interest.
